# Supplementary material for: Daily blueberry consumption for 12 weeks improves endothelial function in postmenopausal women with above-normal blood pressure through reductions in oxidative stress: a randomized controlled trial
Source: Royal Society of Chemistry journal article supplement (doi:10.1039/d3fo00157a), 2023-01-01
Supplement: d3fo00157a1.pdf [file d3fo00157a1.pdf]

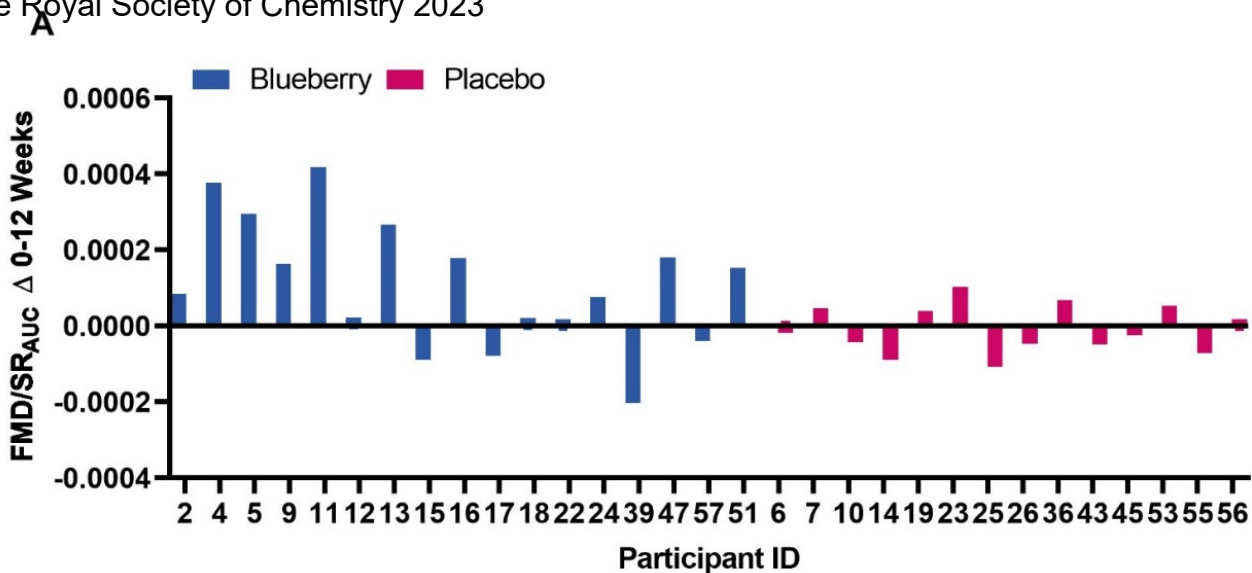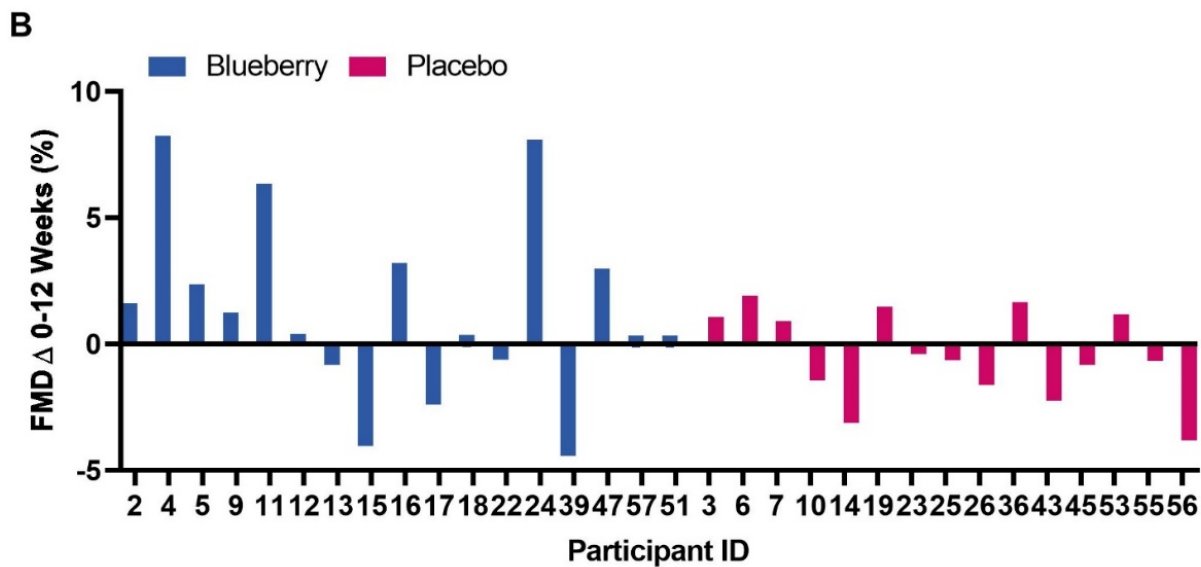

**Supplementary Fig. 1.** (A) Individual changes from baseline to 12 weeks for FMD normalized to shear rate area under the curve (FMD/SR<sub>AUC</sub>); and (B) FMD (not normalized to SR<sub>AUC</sub>).
